# Supplementary material for: Angiogenesis stimulated by elevated PDGF-BB in subchondral bone contributes to osteoarthritis development
Source: JCI journal article supplement (doi:10.1172/jci.insight.135446), 2020-03-24
Supplement: sd1 [file 1]

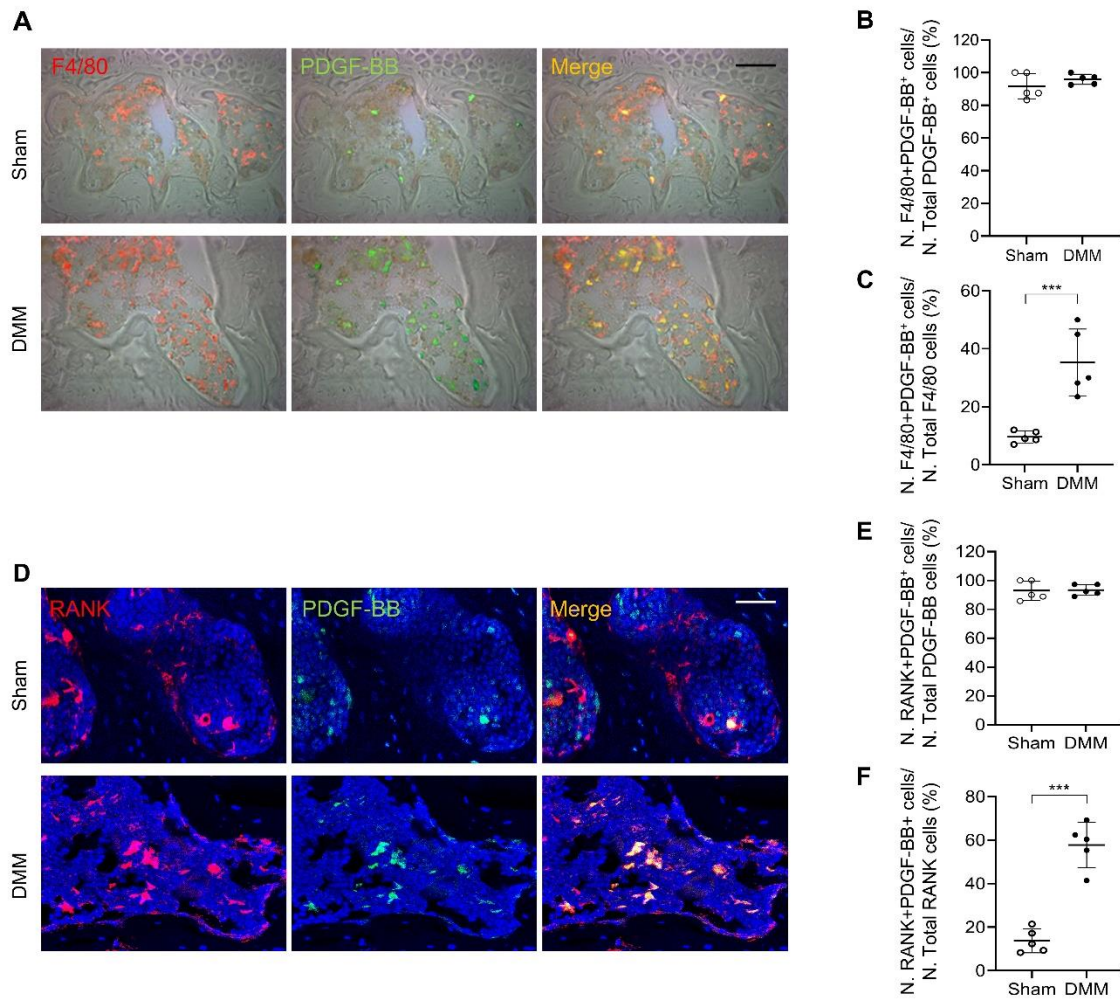

**Supplemental Figure. 1** Three-month-old C57BL/6 mice underwent destabilization of the medial meniscus (DMM) or sham surgery. n=5 mice per group. Immunofluorescence staining of F4/80 (red) and PDGF-BB (green) (**A**) with quantifications of the percentage of F4/80<sup>+</sup>PDGF-BB<sup>+</sup> cells/ Total PDGF-BB<sup>+</sup> cells (**B**) and the percentage of F4/80<sup>+</sup>PDGF-BB<sup>+</sup> cells/ Total F4/80<sup>+</sup> cells (**C**) per tissue area, respectively in subchondral bone of the tibia. Scale bar, 40μm. Immunofluorescence staining of RANK (red) and PDGF-BB (green) (**D**) with quantifications of the percentage of RANK<sup>+</sup>PDGF-BB<sup>+</sup> cells/ Total PDGF-BB<sup>+</sup> cells (**E**) and the percentage of RANK<sup>+</sup>PDGF-BB<sup>+</sup> cells/ Total RANK<sup>+</sup> cells (**F**) per tissue area, respectively, in subchondral bone of the tibia. Scale

bar, 40 $\mu$ m. \*\*\* $p < 0.001$ . Statistical significance was determined by unpaired, 2-tailed Student's t test.

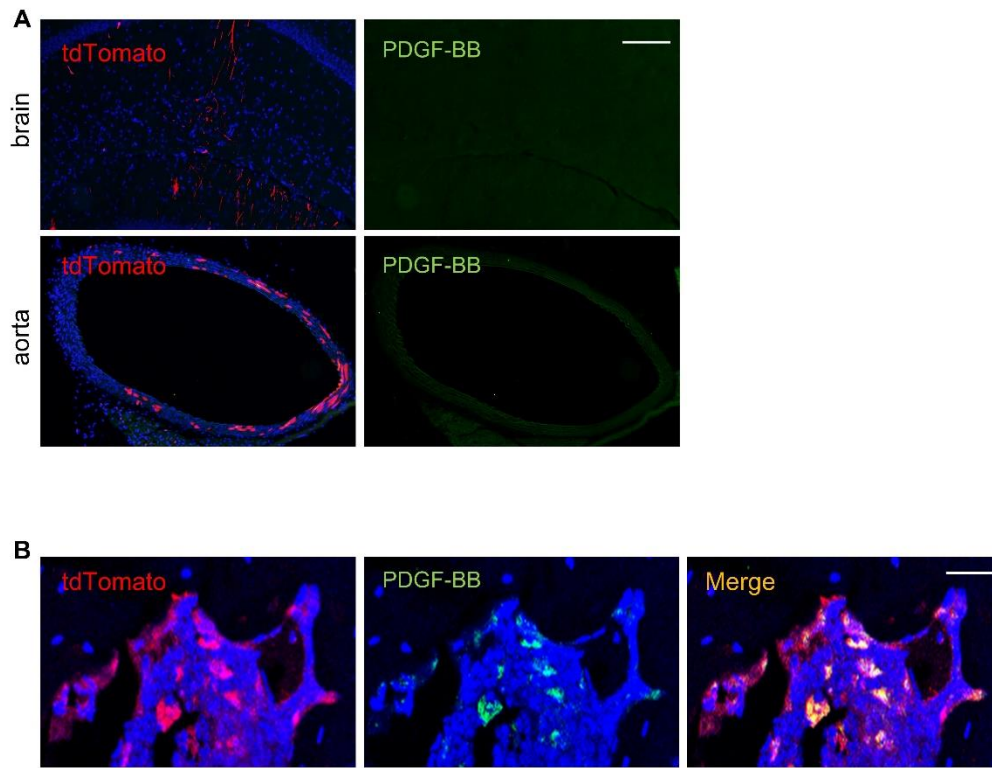

**Supplemental Figure. 2** Brain, aorta and knee joints were harvested from three-month-old *TRAP-Cre; Rosa26-tdTomato* mice (**A**) Immunofluorescence staining of tdTomato (red) and PDGF-BB (green) in brain and aorta, Scale bar, 100 $\mu$ m. (**B**) Immunofluorescence staining of tdTomato (red) and PDGF-BB (green) in subchondral bone. Scale bar, 40 $\mu$ m.
